# Supplementary material for: Groundwater data improve modelling of headwater stream CO 2 outgassing with a stable DIC isotope approach
Source: Copernicus journal article supplement (doi:10.5194/bg-2017-357), 2017-09-14
Supplement: Supplementary file 1 [file Supplement_Figure_S1_and_S2.docx]

Figure S1: Data of measured discharge, in situ *p*CO2, , and DIC concentrations at the Uhlirska catchment outlet (UHL).

Figure S2: CO2 loss, soil *p*CO2 and k600 obtained via the model from Polsenaere and Abril (2012) (dotted line) and modified with groundwater data (solid line).
