# Supplementary material for: Groundwater data improve modelling of headwater stream CO 2 outgassing with a stable DIC isotope approach
Source: Copernicus journal article supplement (doi:10.5194/bg-2017-357), 2017-09-14
Supplement: Supplementary file 3 [file TableS1.xlsx]

## Sheet: Blatt1
Table S1: Model input file with annual mean POC as Delta13POC for monthly data from September 2014 to April 2016, excluding November 2014 (no data available) and groundwater Delta13DIC (DST, P84 and HST), mean values and including fractionation (O'Leary, 1984).
Input file											*Groundwater input data
Temperatureriver	K600	Riverheight	ProportionSilicates	DICSiCa	pCO2	Delta13DIC	Delta13POC*	ProportionAcid	ProportionRespRiver	d13CDIC	DST	P84	HST	Mean	With fractionation
10.9	1	1	1	0.024005	1419.23	-20.91	-29.5	0	0.14	-25.14		-23.75	-24.53	-24.14	-25.14
7.7	1	1	1	0.178037	2217.03	-21.62	-29.5	0	0.14	-25.3433	-24.23	-23.78	-25.02	-24.3433	-25.3433
3	1	1	1	0.230048	1523.33	-15.59	-29.5	0	0.14	-23.92	-22.93	-22.11	-23.72	-22.92	-23.92
1.9	1	1	1	0.180038	1530.19	-20.02	-29.5	0	0.14	-24.5967	-22.76	-23.98	-24.05	-23.5967	-24.5967
4.3	1	1	1	0.140029	2762.61	-16.46	-29.5	0	0.14	-24.6	-22.94	-24.26		-23.6	-24.6
3.2	1	1	1	0.0640134	920.286	-21.34	-29.5	0	0.14	-24.85	-22.59	-24.34	-24.62	-23.85	-24.85
0.9	1	1	1	0.0520109	1838.3	-17.5	-29.5	0	0.14	-24.6067	-22.14	-24.12	-24.56	-23.6067	-24.6067
5.1	1	1	1	0.126026	1514.21	-18.53	-29.5	0	0.14	-25.5433	-24.03	-24.78	-24.82	-24.5433	-25.5433
8.1	1	1	1	0.170036	1561.99	-15.15	-29.5	0	0.14	-25.0233	-23.44	-24.29	-24.34	-24.0233	-25.0233
9.2	1	1	1	0.218046	2120.42	-15.01	-29.5	0	0.14	-25.1967	-23.53	-24.23	-24.83	-24.1967	-25.1967
11.9	1	1	1	0.196041	1909.56	-15.1567	-29.5	0	0.14	-25.5867	-23.9	-24.96	-24.9	-24.5867	-25.5867
13	1	1	1	0.0540113	1538.41	-22.3575	-29.5	0	0.14	-24.74	-22.42	-24.39	-24.41	-23.74	-24.74
8.9	1	1	1	0.270056	732.674	-13.98	-29.5	0	0.14	-24.6033	-23.63	-23.22	-23.96	-23.6033	-24.6033
6.4	1	1	1	0.500105	1017.31	-20.31	-29.5	0	0.14	-24.61	-22.77	-23.71	-24.35	-23.61	-24.61
2.8	1	1	1	0.150031	1557.89	-19.4	-29.5	0	0.14	-25.94	-23.23	-24.56	-27.03	-24.94	-25.94
4	1	1	1	0.120025	1447.98	-18.4225	-29.5	0	0.14	-24.2833	-22.78	-23.52	-23.55	-23.2833	-24.2833
-0.1	1	1	1	0.170036	1305.48	-16.71	-29.5	0	0.14	-24.4767	-22.94	-23.5	-23.99	-23.4767	-24.4767
1.2	1	1	1	0.0360075	1086.69	-18.62	-29.5	0	0.14	-24.89	-23.11	-24.26	-24.3	-23.89	-24.89
2.8	1	1	1	0.024005	965.889	-22.29	-29.5	0	0.14	-25.7983	-24.025	-24.94	-25.43	-24.7983	-25.7983
2.9	1	1	1	0.0960201	648.108	-18.79	-29.5	0	0.14	-25.5542	-23.9125	-24.74	-25.01	-24.5542	-25.5542
