# Supplementary material for: Groundwater data improve modelling of headwater stream CO 2 outgassing with a stable DIC isotope approach
Source: Copernicus journal article supplement (doi:10.5194/bg-2017-357), 2017-09-14
Supplement: Supplementary file 5 [file TableS2.xlsx]

## Sheet: Blatt
Table S2: Modelled carbon dioxide loss via outgassing from the stream to the atmosphere upstream of the Uhlirska catchment outlet (UHL) based on the model by Polsenaere and Abril (2012). Values are for monthly sampling and results from streamCO2-DEGAS relate to proportion river respiration inputs of 14, 25, 50 and 75 % and to incorporation of groundwater data. Annual averages correspond to 12 con…
Month	CO2 loss
	0.14	0.25	0.5	0.75	Groundwater
	kg C month-1	kg C month-1	kg C month-1	kg C month-1	kg C month-1
2014-09-01	254	330	706	4668	114
2014-10-01	136	164	254	414	74
Nov-14**	523	679	1661	4658	179
2014-12-01	909	1194	3068	8902*	285
2015-01-01	136	158	220	315	66
2015-02-01	123*	140*	189*	257*	63*
2015-03-01	109	123	158	200	60
2015-04-01	266	318	510	965	167
2015-05-01	1531	215*	339*	612*	337
2015-06-01	812*	215*	339*	612*	2656
2015-07-01	812*	215*	339*	612*	1471
2015-08-01	94	112	169	260	37
2015-09-01	20	22	26	32	14
2015-10-01	49	55	71	90	27
2015-11-01	122	143	211	331	90
2015-12-01	244	291	457	833	104
2016-01-01	190	223	341	591	92
2016-02-01	155	187	310	654	77
2016-03-01	82	95	130	175	57
2016-04-01	15	17	20	23	12
Annual	4794	2651	4823	5652	5221
	kg C yr-1	kg C yr-1	kg C yr-1	kg C yr-1	kg C yr-1
*Interpolated value is used because the convergence criteria were not attainable.
** Interpolated values.
