# Supplementary material for: Groundwater data improve modelling of headwater stream CO 2 outgassing with a stable DIC isotope approach
Source: Copernicus journal article supplement (doi:10.5194/bg-2017-357), 2017-09-14
Supplement: Supplementary file 7 [file TableS3.xlsx]

## Sheet: Blatt
Table S3: Modelled pCO2init. versus modelled CO2 loss for results computed with R = 14 % and with groundwater contribution.
Month	CO2 loss*	pCO2Init.*	CO2 loss**	pCO2Init.**
	kg C month-1	ppmV	kg C month-1	ppmV
2014-09-01	254.476	4510.47	113.63	2799.43
2014-10-01	135.98	5600.32	73.6424	4049.33
2014-11-01	522.546	11143.6	179.116	5159.75
2014-12-01	909.112	16686.9	284.59	6270.16
2015-01-01	136.388	3830.81	66.4805	2651.38
2015-02-01	122.598	2571.61	63.2643	1893.97
2015-03-01	108.808	1312.4	60.0481	1136.57
2015-04-01	265.635	6022.68	166.832	4345.68
2015-05-01	1531.37	56948.7	336.945	13748.3
2015-06-01	812.47	29880.6	2656.14	131046
2015-07-01	812.47	29880.6	1471	71779.8
2015-08-01	93.5683	2812.5	37.0692	2042.89
2015-09-01	19.9657	1788.47	13.5485	1449.2
2015-10-01	48.8915	1688.45	26.5423	1381.49
2015-11-01	122.32	4763.87	89.8225	3912.2
2015-12-01	244.019	5538.03	103.657	3185.39
2016-01-01	189.765	6103.53	91.7299	3624.72
2016-02-01	154.601	3610.36	77.1732	2346.69
2016-03-01	82.3527	1392.19	56.6301	1259
2016-04-01	15.47	850.203	12.2808	808.619
Confergence criteria not fulfilled
*Calculation with annual mean d13C-POC and R = 14 %.
**Calculation with mean groundwater d13C-DIC as d13C-CO2init +1‰ fractionation (O'Oleary, 1984).
